# Supplementary material for: Yomogin, Isolated from Artemisia iwayomogi, Inhibits Neuroinflammation Stimulated by Lipopolysaccharide via Regulating MAPK Pathway
Source: MDPI journal article supplement (doi:10.3390/antiox12010106), 2022-12-31
Supplement: s1 [file s1]

**Figure S1.**  $^1\text{H}$ -NMR spectrum of yomogin (500MHz, chloroform- $d$ ).

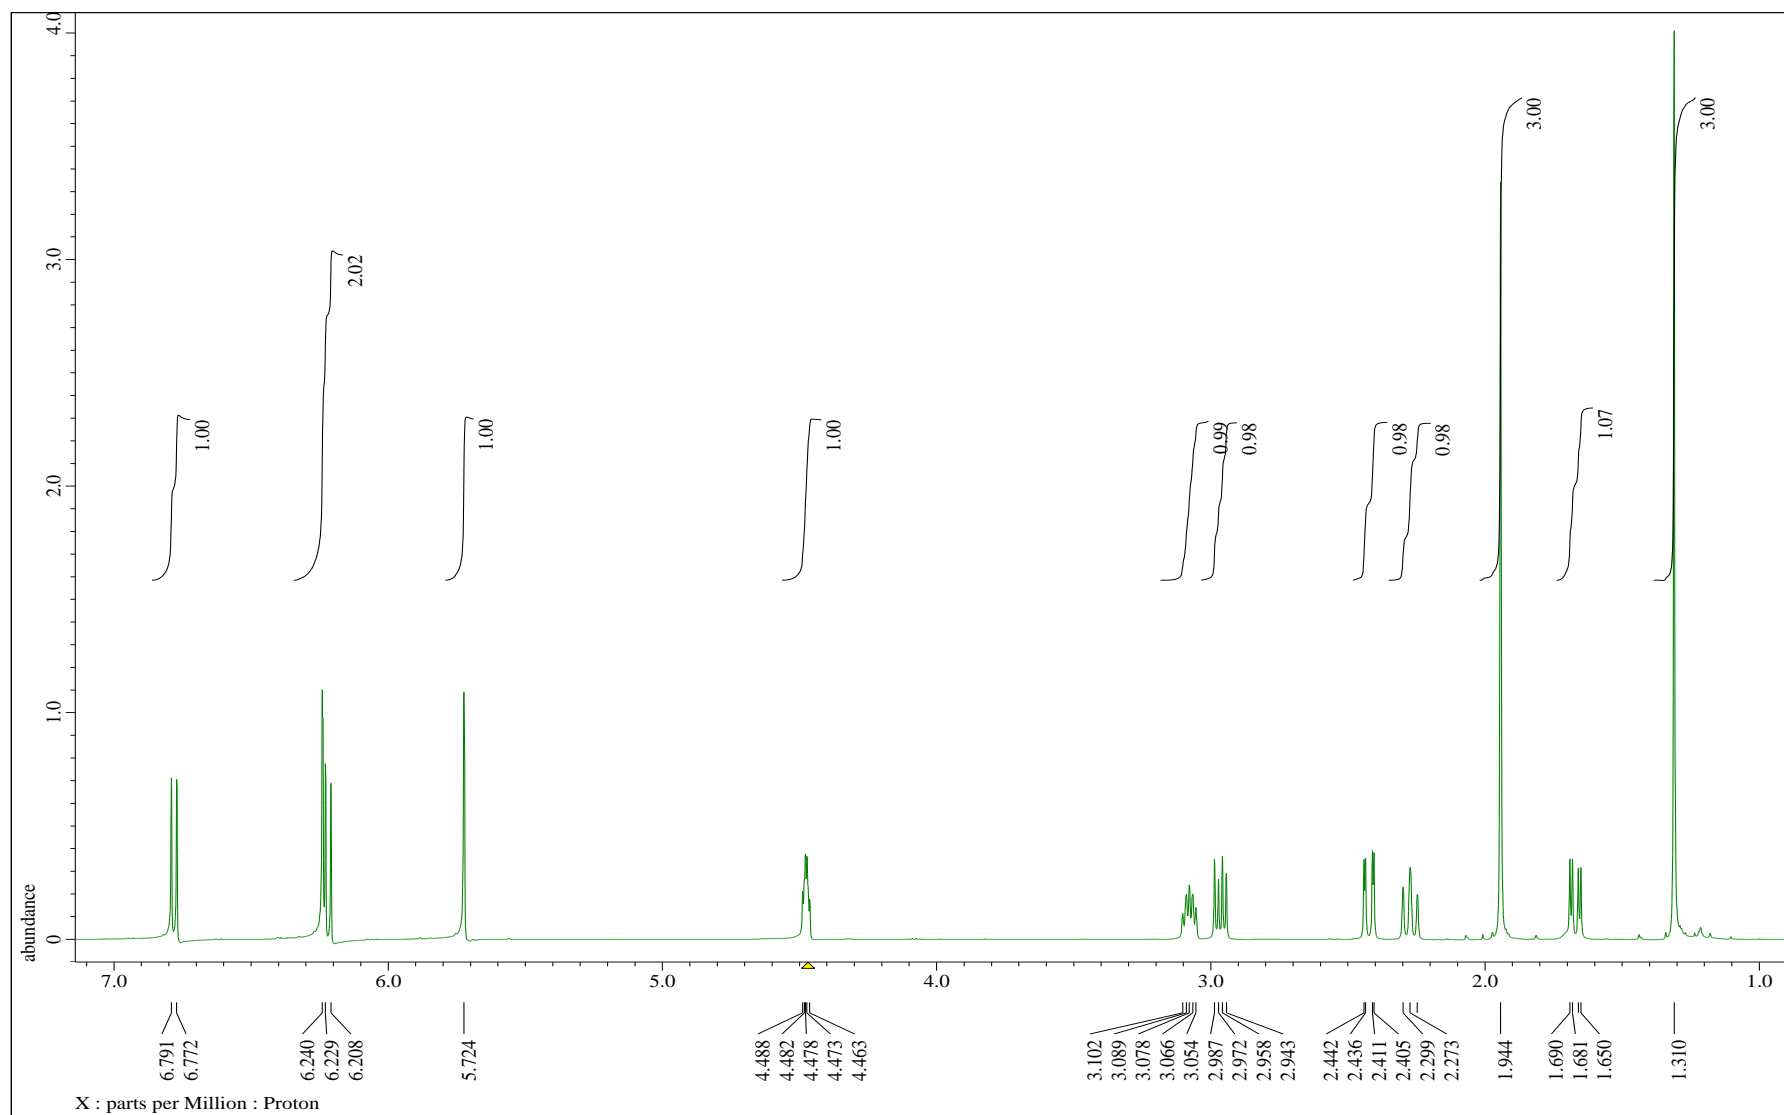

**Figure S2.**  $^{13}\text{C}$ -NMR spectrum of yomogin (125MHz, chloroform-*d*).

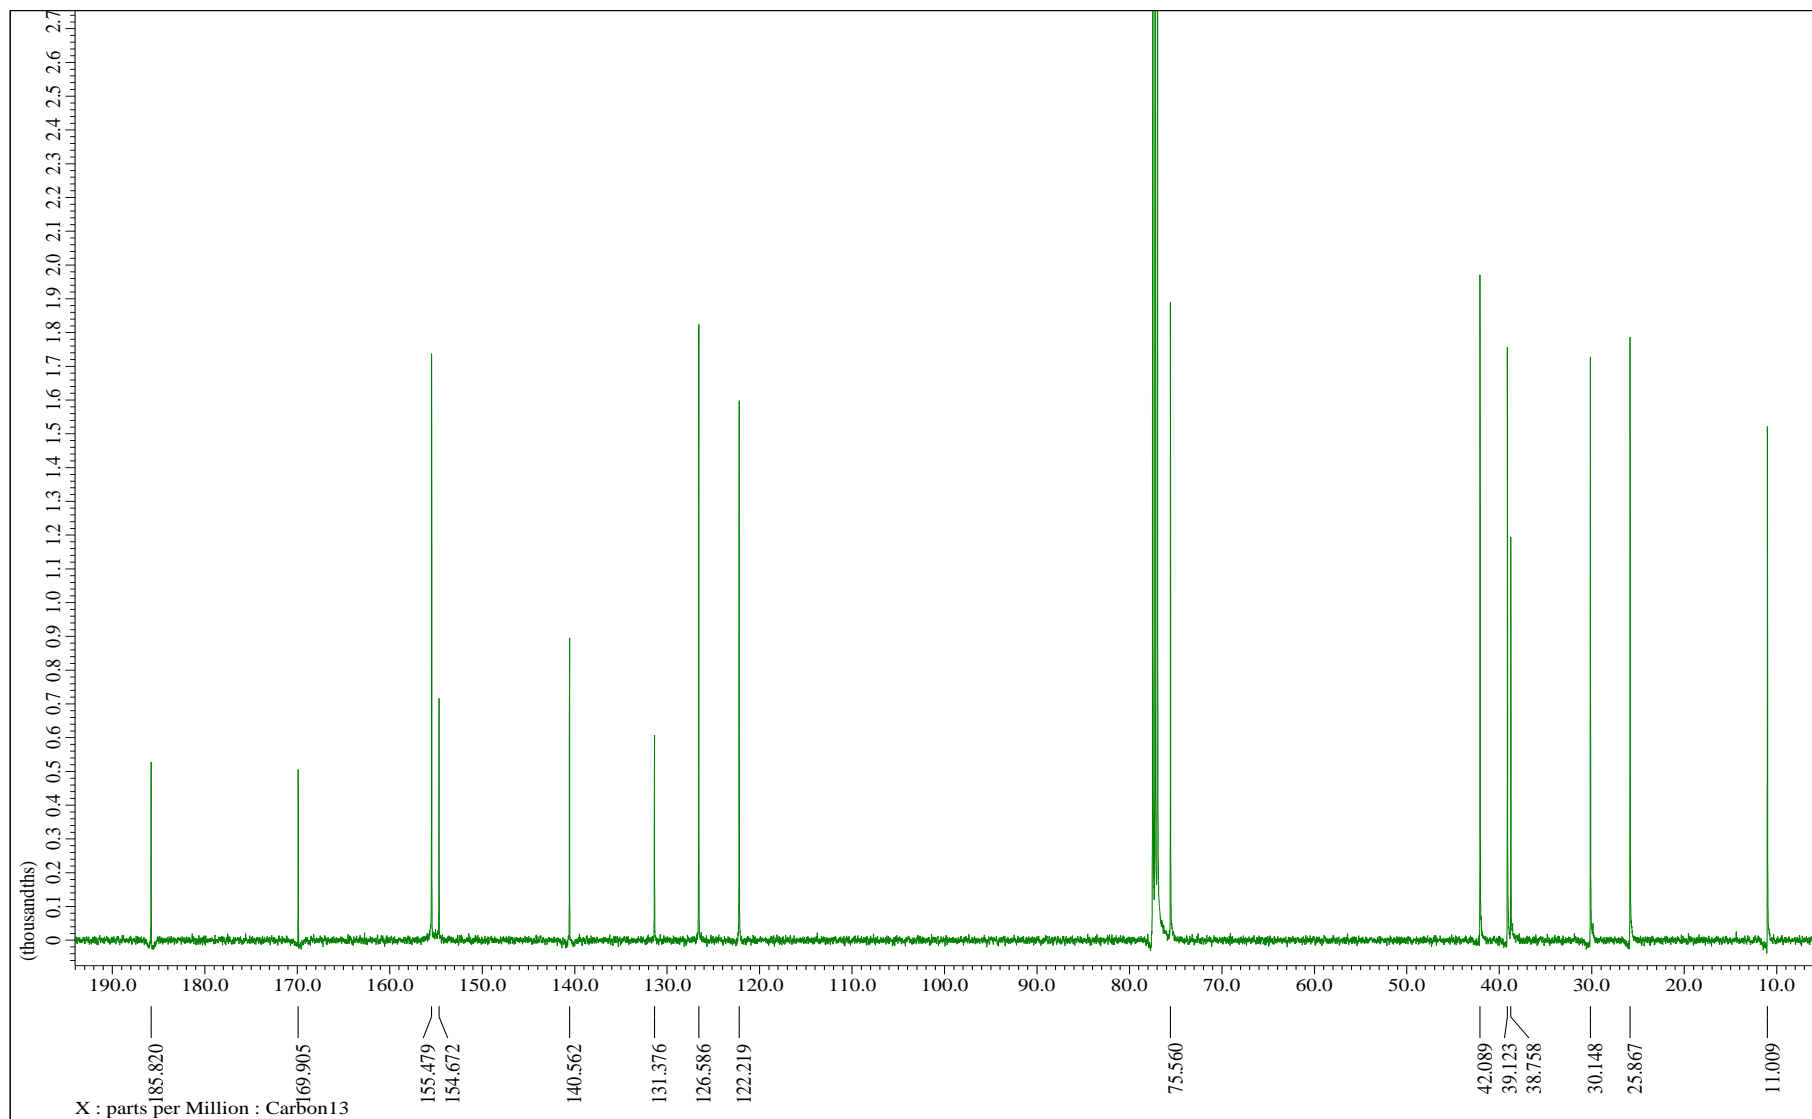

**Figure S3.** ESI-MS data of yomogin.

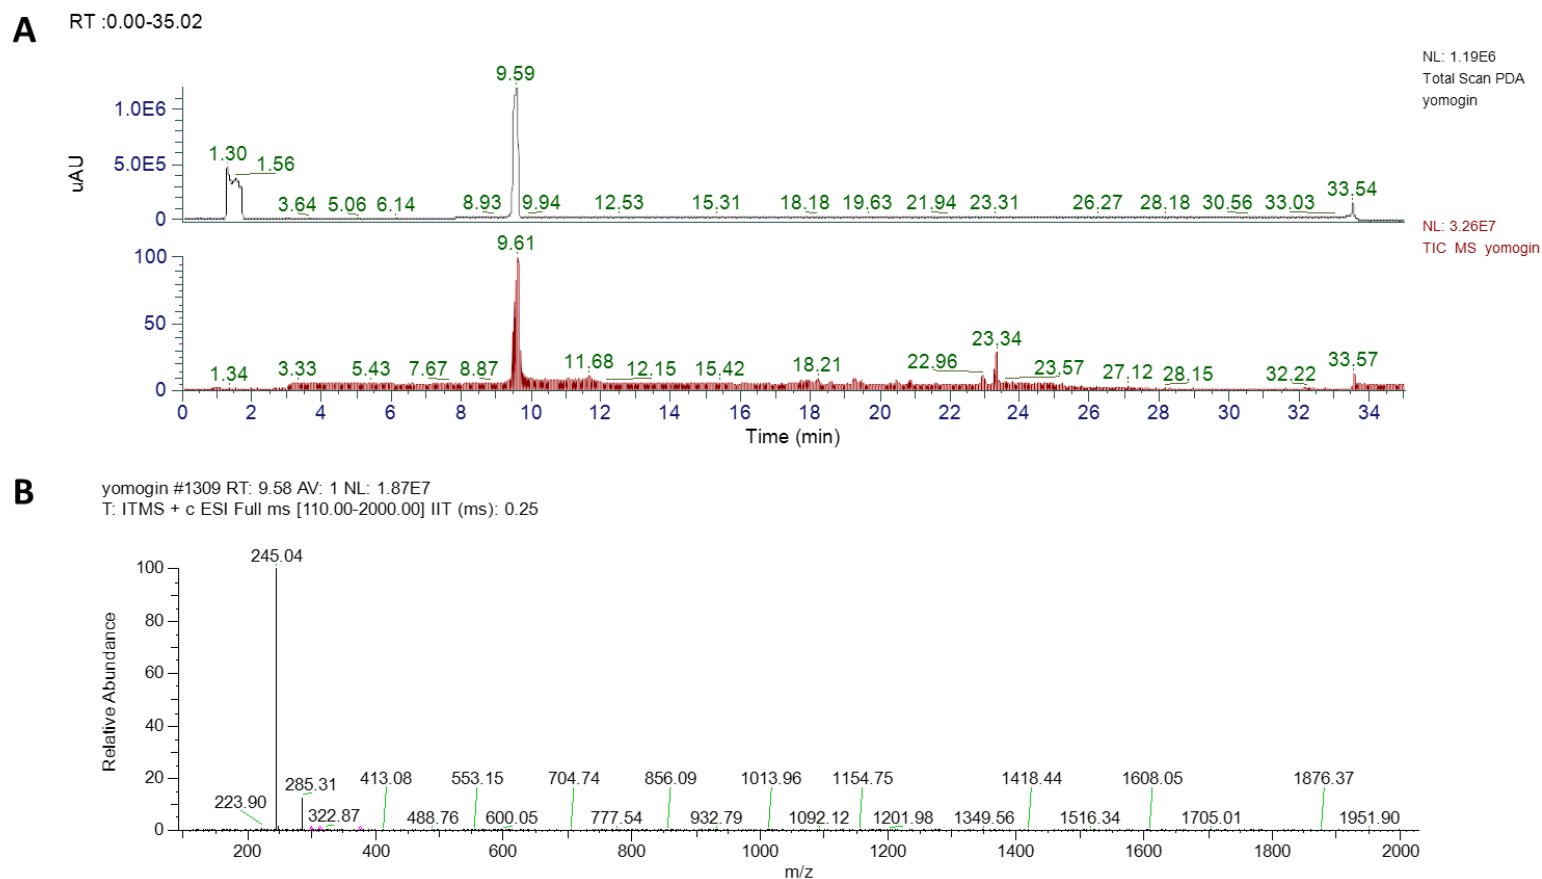

**A:** UHPLC chromatogram of yomogin at PDA (up, RT: 9.59 min) and total ion chromatogram (TIC) of yomogin (down); **B:** Electrospray ionization (ESI) full-scan precursor ion mass data (positive mode,  $m/z = 245.04$ , mass tolerance = 0.5 amu). Data collected by Thermo Fisher Vanquish UHPLC and LTQ-XL MS<sup>n</sup> system.
